# Supplementary material
Source: PubMed Central journal article supplement (PMC4073439)
Supplement: ASN.2013090921_ASN2013090921SupplementaryData.pdf [file ASN.2013090921_ASN2013090921SupplementaryData.pdf]

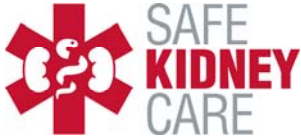

Participant ID:

Participant Initials:

Visit Number:

Visit Date:   /   /      
MM DD YYYY

RC ID:

CRF Date:   /   /      
MM DD YYYY

## SELF-REPORTED SAFETY EVENTS (SRSE) BASELINE

1. In the past 12 months, have you had any of the following problems and, if so, can you also tell me if the problem caused you to go to the emergency room or caused you to be hospitalized? (**check all that apply**)

|    |                          | Problem                                                                                                                                                                                                                            | ER or Hospitalization                                                                                             |
|----|--------------------------|------------------------------------------------------------------------------------------------------------------------------------------------------------------------------------------------------------------------------------|-------------------------------------------------------------------------------------------------------------------|
| a. | <input type="checkbox"/> | nervousness, sweating, trembling, weakness, palpitations, and/or confusion with a blood sugar less than 70 (mg/dL), by finger stick or blood test, that improved with glucose tablets, juice, or other substance with sugar in it? | <input type="checkbox"/> <b>Yes</b> <input type="checkbox"/> <b>No</b> <input type="checkbox"/> <b>Don't know</b> |
| b. | <input type="checkbox"/> | blood sugar less than 60 (mg/dL), by finger stick or blood test, with or without symptoms                                                                                                                                          | <input type="checkbox"/> <b>Yes</b> <input type="checkbox"/> <b>No</b> <input type="checkbox"/> <b>Don't know</b> |
| c. | <input type="checkbox"/> | high potassium blood level requiring a change in medication, change in diet, and/or required you to take a prescription of kayexelate or polystyrene (dark brown fluid prescribed to decrease potassium)?                          | <input type="checkbox"/> <b>Yes</b> <input type="checkbox"/> <b>No</b> <input type="checkbox"/> <b>Don't know</b> |

Participant ID:

Participant Initials:

Visit #:

2. In the past 12 months, have you had any of the following problems that you thought was related to a medication and, if so, can you also tell me if the problem caused you to go to the emergency room or caused you to be hospitalized? (**check all that apply**)

|    |                          | <b>Problem</b>                                                          | <b>ER or Hospitalization</b>                                                                                      |
|----|--------------------------|-------------------------------------------------------------------------|-------------------------------------------------------------------------------------------------------------------|
| a. | <input type="checkbox"/> | dizziness when standing up to the point that you thought you might fall | <input type="checkbox"/> <b>Yes</b> <input type="checkbox"/> <b>No</b> <input type="checkbox"/> <b>Don't know</b> |
| b. | <input type="checkbox"/> | falling                                                                 | <input type="checkbox"/> <b>Yes</b> <input type="checkbox"/> <b>No</b> <input type="checkbox"/> <b>Don't know</b> |
| c. | <input type="checkbox"/> | bleeding                                                                | <input type="checkbox"/> <b>Yes</b> <input type="checkbox"/> <b>No</b> <input type="checkbox"/> <b>Don't know</b> |
| d. | <input type="checkbox"/> | facial, tongue, and/or throat swelling                                  | <input type="checkbox"/> <b>Yes</b> <input type="checkbox"/> <b>No</b> <input type="checkbox"/> <b>Don't know</b> |
| e. | <input type="checkbox"/> | confusion or unable to think clearly                                    | <input type="checkbox"/> <b>Yes</b> <input type="checkbox"/> <b>No</b> <input type="checkbox"/> <b>Don't know</b> |
| f. | <input type="checkbox"/> | nausea, vomiting, and/or diarrhea                                       | <input type="checkbox"/> <b>Yes</b> <input type="checkbox"/> <b>No</b> <input type="checkbox"/> <b>Don't know</b> |
| g. | <input type="checkbox"/> | new or worsening ankle swelling                                         | <input type="checkbox"/> <b>Yes</b> <input type="checkbox"/> <b>No</b> <input type="checkbox"/> <b>Don't know</b> |
| h. | <input type="checkbox"/> | muscle weakness or muscle cramps                                        | <input type="checkbox"/> <b>Yes</b> <input type="checkbox"/> <b>No</b> <input type="checkbox"/> <b>Don't know</b> |
| i. | <input type="checkbox"/> | skin rash                                                               | <input type="checkbox"/> <b>Yes</b> <input type="checkbox"/> <b>No</b> <input type="checkbox"/> <b>Don't know</b> |

**For Research Coordinator Use Only**

3. This CRF was:                       Self-administered                       Interviewer-administered
